1 Mass Mortality of Marine Mammals Associated to Highly Pathogenic Influenza Virus  
2 (H5N1) in South America

3 Víctor Gamarra-Toledo<sup>1\*</sup>, Pablo I. Plaza<sup>2</sup>, Roberto Gutiérrez<sup>1,3</sup>, Giancarlo Inga-Díaz<sup>3,4</sup>,  
4 Patricia Saravia-Guevara<sup>3</sup>, Oliver Pereyra-Meza<sup>3</sup>, Elver Coronado-Flores<sup>3</sup>, Antonio  
5 Calderón-Cerrón<sup>3</sup>, Gonzalo Quiroz-Jiménez<sup>3</sup>, Paola Martínez<sup>3</sup>, Deyvis Huamán-  
6 Mendoza<sup>3</sup>, José C. Nieto-Navarrete<sup>3</sup>, Sandra Ventura<sup>3</sup>, Sergio A. Lambertucci<sup>2</sup>

7

8 <sup>1</sup> Museo de Historia Natural (MUSA), Universidad Nacional de San Agustín de  
9 Arequipa, Av. Alcides Carrión s/n, Arequipa,  
10 Perú.

11

12 <sup>2</sup> Grupo de Investigaciones en Biología de la Conservación, Laboratorio Ecotono,  
13 INIBIOMA, Universidad Nacional del Comahue - CONICET, Quintral 1250  
14 (R8400FRF), San Carlos de Bariloche, Argentina.

15

16 <sup>3</sup> Servicio Nacional de Áreas Naturales Protegidas por el Estado (SERNANP). Calle  
17 Diecisiete 355, Urb. El Palomar, San Isidro, Lima, Perú.

18

19 <sup>4</sup> Asociación Convive Perú, Puerto Maldonado, Madre de Dios, Perú.

20

21 \* Corresponding author: [vgamarrat@unsa.edu.pe](mailto:vgamarrat@unsa.edu.pe)

22

23

24 **Acknowledgments:** We thank the Unidad Operativa Funcional Monitoreo, Vigilancia y  
25 Control (Dirección de Gestión de Áreas Naturales Protegidas) of the Servicio Nacional  
26 de Áreas Naturales Protegidas por el Estado (SERNANP) of the Peruvian Ministry of  
27 Environment, for the permission to access and use the information provided  
28 (Expediente Tupa N° 0108-2023; CARTA No 053 - 2023-SERNANP-AIP). We  
29 especially thank SERNANP park rangers for their help in the field survey and their  
30 involvement in the conservation and monitoring of wildlife in response to this health  
31 emergency. We also thank the staff of the Wildlife Conservation Society (WCS),  
32 especially Paulo Colchao, Jorge Martinez and Mariana Montoya, for their institutional  
33 and logistical support during field sample collection. Finally, we thank all public  
34 institutions that contribute to the monitoring of this epizootic and epidemiological  
35 surveillance in Peru.

36

### 37 **Biography**

38 Víctor Gamarra-Toledo, MSc(c). Biologist, research associate at the Museum of Natural  
39 History (MUSA), Universidad Nacional de San Agustín de Arequipa, Peru. With  
40 experience in wildlife conservation in coastal ecosystems of Peru.

41

42

43 **ABSTRACT**

44 We report a massive mortality of more than 3,000 sea lions (*Otaria flavescens*) of Peru  
45 associated with a Highly Pathogenic Influenza Virus (H5N1). The transmission pathway  
46 of H5N1 may have been through the close contact of sea lions with infected wild birds.  
47 We cannot rule out direct transmission among sea lions.

48 The recent panzootic event (2020-2022) caused by the highly pathogenic avian  
49 influenza (HPAI) A (H5N1) is the largest observed so far, several global outbreaks  
50 having been caused (1). At the end of 2022, the H5N1 virus reached South America  
51 (Peru, Ecuador, Colombia, Venezuela and Chile), with alarming bird mortalities in Peru  
52 (2). This pathogen was detected for the first time in wild birds in Peru on 13 November  
53 (2). Reports suggest the virus killed more than 50,000 wild birds by the end of 2022,  
54 particularly Peruvian pelicans (*Pelecanus thagus*) and Peruvian boobies (*Sula*  
55 *variegata*) (2,3). The large biomass of infected wild birds may have led to a spillover  
56 event affecting predators and scavengers, including marine mammals cohabiting with  
57 them, as reported in other parts of the world (4). Here, we report the death of 3,108 sea  
58 lions (*Otaria flavescens*) on Peruvian coasts over 5 weeks and necropsies of some  
59 individuals that suggest they were affected by the Highly Pathogenic Avian Influenza  
60 Virus (H5N1), this was lately confirmed by government reports.

61 During January and February 2023, we performed detailed survey of died mammals in  
62 marine protected areas of Peru with SERNANP personal (Servicio Nacional de Áreas  
63 Naturales Protegidas por el Estado), throughout a surveillance system for avian  
64 influenza in high biodiversity areas. More than three thousand sea lions were found  
65 dead or dying on Peruvian beaches (Fig. 1.1, Table 1). The high mortality observed was  
66 worrisome; for instance, up to 100 dead individuals were found floating together in the  
67 sea, or 1,112 individuals died just in one island (Isla San Gallan); one of the places with  
68 the highest populations of sea lions in Peru. Those are unprecedented observations for  
69 the Southern Hemisphere (Fig. 1.1, Fig. 1.2 A and B, Table 1). The clinical signs of  
70 dying individuals were mainly neurological, such as tremors, convulsions and paralysis.  
71 They also showed respiratory signs such as dyspnea, tachypnea, nasal and buccal  
72 secretions and pulmonary edema (Fig. 1.2 C). At the time of the deaths many sea lions

73 were pregnant or recently calved females; several abortions were observed. There are no  
74 other records of such high mortality of aggregated sea lions, and this is the highest  
75 mammal mortality recorded in the world that can be associated to HPAV until now.

76 Individuals were examined by veterinarians and some dead animals were necropsied.  
77 The body condition of the sea lions necropsied ranged from good to very good,  
78 suggesting they died due to an acute health problem. Substantial quantities of whitish  
79 secretions filling the upper respiratory tracts (trachea and pharynx) were observed in the  
80 necropsies and in dying animals (Fig. 1.2 C), which explains the severe dyspnea and  
81 tachypnea clinically observed by veterinarians. Lungs were congestive, with  
82 hemorrhagic focus compatible with interstitial pneumonia. Brains were also congestive  
83 with hemorrhagic focus compatible with encephalitis, which explains the neurological  
84 signs observed in dying individuals (Fig. 1.2 D); this agrees with the result of other  
85 study on mammals infected with H5N1 (5). The small intestine showed necrotic focus  
86 compatible with duodenitis. At the time of writing this letter (February 2023) sea lions  
87 mortalities continue and have reached up to 3,108 died individuals. Given the  
88 epidemiologic situation produced by H5N1 in wild birds that cohabit with these sea  
89 lions (2,3), our most plausible diagnosis was acute disease caused by HPAV. Official  
90 information from Peruvian government confirmed that some of those sea lions tested  
91 positive to HPAI (H5N1) (3,6,7).

92 In conclusion, sea lions of Peru developed a deadly associated disease that have  
93 produced massive mortality in several regions of the Peruvian coastline (Fig. 1.1). The  
94 sea lion mass mortality described is compatible with systemic HPAI that resulted in  
95 acute encephalitis and pneumonia. Some specific cases of infection and mortality of  
96 marine mammals due to HPAV with similar clinical and anatomopathological  
97 characteristics have been reported in previous studies around the world (4,8,9).

98 The source of the HPAI affecting these sea lions was most probably the large number of  
99 infected alive birds or their carcasses on the Peruvian coastline (2,3). Sea lions may be  
100 infected by close contact with these carcasses and even through their consumption (see  
101 an example of a sea lion feeding on a sick bird in Fig. 1.2 E). However, based on recent  
102 research suggesting the first mammal-to-mammal infection in *Neovison vison* (10) and  
103 the large number of sea lions currently affected at the same time, we cannot rule out that  
104 the virus has adapted to mammals and that sea lion-sea lion transmission has begun in  
105 Peru, and this needs to be urgently studied.

106 Worryingly, at the time of this submission Bolivia, Uruguay and Argentina add to list of  
107 countries that have reported HPAV in their territories for the first time (11). Moreover,  
108 authorities from Chile have reported the first sea lion dead due to HPAV in the north of  
109 the country with similar clinical signs that we reported in Peru (11).

110 Further research is required to address the transmission pathway in this social species.

111 We would like to call attention to the fact that in this geographical region of the world,  
112 human–infected animal interaction is common (e.g., people stain in beaches with sea  
113 lions carcasses, (12) (Fig. 1.2 F), so infections might begin to rise and this must be  
114 addressed if we are to avoid the risk of a pandemic.

## 115 **References**

- 116 1. Wille M, Barr IG. Resurgence of avian influenza virus. *Science*. 2022 Apr  
117 29;376(6592):459–60.
- 118 2. Gamarra-Toledo V, Plaza PI, Gutiérrez R, Luyo P, Hernani L, Angulo F, et al. Avian  
119 flu threatens Neotropical birds. *Science*. 2023;379(6629):246–246.
- 120 3. Sala de influenza aviar. Available from: <https://www.dge.gob.pe/influenza-aviar-ah5/>. Accessed February 2023.
- 122 4. Puryear W, Sawatzki K, Hill N, Foss A, Stone JJ, Doughty L, et al. Outbreak of  
123 Highly Pathogenic Avian Influenza H5N1 in New England Seals. *bioRxiv*.  
124 2022;2022–07.

- 125 5. Vreman S, Kik M, Germeraad E, Heutink R, Harders F, Spierenburg M, et al.  
126 Zoonotic Mutation of Highly Pathogenic Avian Influenza H5N1 Virus Identified in  
127 the Brain of Multiple Wild Carnivore Species. *Pathogens*. 2023;12(2):168.
- 128 6. OFICIO-0017-2023-MIDAGRI-SENASA-DSA. Available from:  
129 <https://www.inforegion.pe/wp-content/uploads/2023/02/OFICIO-0017-2023->  
130 [MIDAGRI-SENASA-DSA\\_CDC.pdf](https://www.inforegion.pe/wp-content/uploads/2023/02/OFICIO-0017-2023-MIDAGRI-SENASA-DSA_CDC.pdf)
- 131 7. Sernanp despliega protocolo de monitoreo ante casos de aves y lobos marinos  
132 afectados por influenza aviar en áreas naturales protegidas. Available from:  
133 <https://www.gob.pe/institucion/sernanp/noticias/697084-sernanp-despliega->  
134 [protocolo-de-monitoreo-ante-casos-de-aves-y-lobos-marinos-afectados-por-](https://www.gob.pe/institucion/sernanp/noticias/697084-sernanp-despliega-protocolo-de-monitoreo-ante-casos-de-aves-y-lobos-marinos-afectados-por-)  
135 [influenza-aviar-en-areas-naturales-protegidas](https://www.gob.pe/institucion/sernanp/noticias/697084-sernanp-despliega-protocolo-de-monitoreo-ante-casos-de-aves-y-lobos-marinos-afectados-por-influenza-aviar-en-areas-naturales-protegidas).
- 136 8. Bodewes R, Bestebroer TM, van der Vries E, Verhagen JH, Herfst S, Koopmans MP,  
137 et al. Avian influenza A (H10N7) virus–associated mass deaths among harbor seals.  
138 *Emerging infectious diseases*. 2015;21(4):720.
- 139 9. Shin DL, Siebert U, Lakemeyer J, Grilo M, Pawliczka I, Wu NH, et al. Highly  
140 pathogenic avian influenza A (H5N8) virus in gray seals, Baltic Sea. *Emerging*  
141 *infectious diseases*. 2019;25(12):2295.
- 142 10. Agüero M, Monne I, Sánchez A, Zecchin B, Fusaro A, Ruano MJ, et al. Highly  
143 pathogenic avian influenza A (H5N1) virus infection in farmed minks, Spain,  
144 October 2022. *Eurosurveillance*. 2023; 28(3):2300001.
- 145 11. World Organization for Animal Health (WAHIS). 2023. Available from:  
146 <https://wahis.woah.org/#/home>. Accessed February 2023.
- 147 12. Miraflores: hallan lobo marino herido en playa Punta Roquitas y bañistas piden  
148 ayuda para rescatarlo. *La República*. 2023 Jan 14; Available from:  
149 <https://larepublica.pe/sociedad/2023/01/14/miraflores-hallan-lobo-marino-herido-en->  
150 [la-playa-serfor-nvb](https://larepublica.pe/sociedad/2023/01/14/miraflores-hallan-lobo-marino-herido-en-la-playa-serfor-nvb)

152 **Table 1.** Sea lion mortality associated with Highly Pathogenic Avian Influenza Virus  
 153 (H5N1) in protected areas of Peru between January and February 2023. Abbreviations  
 154 for the Natural Protected Areas are: RNSF = Reserva Nacional San Fernando,  
 155 RNILLESCAS = Reserva Nacional Illescas, RNPACACAS = Reserva Nacional  
 156 Paracas, ZRANCÓN = Zona Reservada Ancón, RNSIIPG = Reserva Nacional Sistema  
 157 de Islas, Islotes y Puntas Guaneras.

| Species                                                   | Date   | Natural Protected Area | Island & Guano island                | Symptoms                                                      | Total deaths |
|-----------------------------------------------------------|--------|------------------------|--------------------------------------|---------------------------------------------------------------|--------------|
| <b>South American Sea Lion (<i>Otaria flavescens</i>)</b> |        |                        |                                      |                                                               |              |
|                                                           | 6-Jan  | RNILLESCAS             |                                      |                                                               | 38           |
|                                                           | 14-Jan | RNPACACAS              | Lagunillas, Supay, Atenas            | Eyes closed and watering, nosebleeds and difficulty breathing | 3            |
|                                                           | 16-Jan | ZRANCÓN                |                                      |                                                               | 4            |
|                                                           | 18-Jan | RNPACACAS              | La Mina                              |                                                               | 1            |
|                                                           | 19-Jan | RNPACACAS              | La Aguada                            |                                                               | 1            |
|                                                           |        | RNSIIPG                | Isla Cavinzas                        |                                                               | 2            |
|                                                           | 20-Jan | RNPACACAS              | Lagunillas, La Roja, Yumaque, Atenas |                                                               | 32           |
|                                                           | 21-Jan | RNPACACAS              | Santo Domingo                        |                                                               | 1            |
|                                                           |        | RNSIIPG                | Punta Lomitas                        | Foaming at the mouth, convulsions, paralysis of the forelimbs | 1            |
|                                                           | 22-Jan | RNSIIPG                | Isla Asia                            |                                                               | 80           |
|                                                           | 23-Jan | RNPACACAS              | Barlovento                           |                                                               | 6            |
|                                                           |        |                        | Isla San Gallan                      |                                                               | 33           |
|                                                           |        | RNSIIPG                | Isla Asia                            |                                                               | 17           |
|                                                           |        |                        | Isla Cavinzas                        |                                                               | 6            |
|                                                           |        |                        | Isla Pachacamac                      |                                                               | 7            |
|                                                           | 24-Jan | RNSIIPG                | Isla Asia                            |                                                               | 20           |
|                                                           |        |                        | Isla Cavinzas                        |                                                               | 4            |
|                                                           | 25-Jan | RNPACACAS              | Lagunillas                           |                                                               | 36           |
|                                                           |        | RNSIIPG                | Isla Asia                            |                                                               | 21           |
|                                                           |        |                        | Isla Cavinzas                        |                                                               | 6            |
|                                                           |        |                        | Punta Lomitas                        |                                                               | 8            |
|                                                           | 26-Jan | RNPACACAS              | Los viejos                           |                                                               | 132          |
|                                                           |        | RNSF                   |                                      | Carcasses floating in the sea                                 | 5            |
|                                                           |        | RNSIIPG                | Isla Asia                            |                                                               | 12           |
|                                                           |        |                        | Punta Lomitas                        |                                                               | 1            |
|                                                           |        |                        | Punta San Juan                       | Convulsions (dying individuals)                               | 2            |



|        |           |                                       |                                      |     |
|--------|-----------|---------------------------------------|--------------------------------------|-----|
| 27-Jan | RNSF      |                                       |                                      | 20  |
|        | RNSIIPG   | Isla Asia                             | Carcasses floating in the sea        | 100 |
|        |           | Isla Pescadores                       |                                      | 2   |
|        |           | Punta Lomitas                         |                                      | 3   |
|        |           | Punta San Juan                        |                                      | 8   |
|        | ZRANCÓN   |                                       |                                      | 3   |
| 28-Jan | RNPARACAS | Arquillo                              |                                      | 1   |
|        | RNSIIPG   | Punta Lomitas                         |                                      | 2   |
| 29-Jan | RNSIIPG   | Punta Lomitas                         |                                      | 10  |
|        |           | Punta San Juan                        |                                      | 2   |
| 30-Jan | RNPARACAS | Ancla                                 | Dyspnea, tremors (dying individuals) | 17  |
|        |           | Caclio                                |                                      | 4   |
|        |           | Chucho                                |                                      | 4   |
|        |           | La Raya                               |                                      | 12  |
|        |           | Punta Prieto                          |                                      | 3   |
|        |           | Rancherio                             |                                      | 5   |
|        | RNSIIPG   | Chincha                               |                                      | 46  |
| 31-Jan | RNPARACAS | Santo Domingo                         |                                      | 2   |
|        |           | Sequion                               | Ataxia, tremors (dying individuals)  | 2   |
| 1-Feb  | RNPARACAS | Yumaque                               |                                      | 6   |
| 2-Feb  | RNPARACAS | Karwas, La Raya                       | Dyspnea, tremors (dying individuals) | 9   |
| 3-Feb  | RNSF      |                                       |                                      | 188 |
|        | RNSIIPG   | Chincha                               |                                      | 10  |
| 4-Feb  | RNPARACAS | Yumaque, Punta Ballena                |                                      | 13  |
| 5-Feb  | RNPARACAS | Yuyos, Caracolito, Lagunilla, La Roja |                                      | 13  |
|        | RNSIIPG   | Chincha                               |                                      | 3   |
| 6-Feb  | RNSIIPG   | Chincha                               |                                      | 2   |
| 7-Feb  | RNSF      | Morro                                 |                                      | 432 |
|        |           | Tunga                                 |                                      | 31  |
| 8-Feb  | RNPARACAS | Arquillo                              |                                      | 8   |
|        |           | Caracolito                            |                                      |     |
|        |           | La Raya                               |                                      | 42  |
|        |           | Yumaque                               |                                      |     |
|        | RNSF      | La Ensenada                           |                                      | 27  |
|        | RNSIIPG   | Punta San Juan                        |                                      | 1   |
| 9-Feb  | RNPARACAS | Antana                                |                                      | 2   |
|        |           | Arquillo                              |                                      | 20  |
|        |           | Barlovento                            |                                      | 3   |
|        |           | Caclio                                |                                      | 22  |
|        |           | El Negro                              |                                      | 5   |
|        |           | La cruz                               |                                      | 6   |
|        |           | Playa Roja                            |                                      | 6   |
|        |           | Santa María                           |                                      | 1   |
|        |           | Supay                                 |                                      | 13  |

|              |           |                        |             |
|--------------|-----------|------------------------|-------------|
|              | RNSIIPG   | Chincha                | 5           |
| 10-Feb       | RNPARACAS | La Aguada              | 4           |
|              |           | Lagunillas             | 4           |
|              |           | Supay                  | 5           |
|              | RNSIIPG   | Isla Asia              | 13          |
| 11-Feb       | RNPARACAS | Supay                  | 2           |
| 12-Feb       | RNPARACAS | Playa Roja             | 2           |
| 14-Feb       | RNPARACAS | El Negro               | 1           |
|              |           | Santo Domingo          | 1           |
| 17-Feb       | RNPARACAS | Arquillo               | 3           |
|              |           | Camino hacia Lagunilla | 1           |
|              |           | Caracolito             | 1           |
|              |           | Lagunillas             | 1           |
|              |           | Los yuyos              | 11          |
|              |           | Morro Quemado          | 332         |
|              |           | Playa Roja             | 3           |
|              |           | Sequion                | 1           |
|              |           | Talpo                  | 2           |
| 19-Feb       | RNPARACAS | Carhuaz                | 1           |
|              |           | Lagunillas             | 1           |
|              |           | Yumaque                | 1           |
|              | SNLM      | Playa                  | 7           |
| 20-Feb       | RNPARACAS | Isla San Gallan        | 1112        |
|              |           | Playa Roja             | 3           |
|              |           | Sacasemita             | 2           |
| 21-Feb       | RNPARACAS | Playa Roja             | 1           |
| <b>Total</b> |           |                        | <b>3108</b> |

158

159

160 **Figure 1.1.** Map of geographical distribution of high mortalities in sea lions in January  
161 and February 2023 on the Peruvian coastline. **Figure 1.2.** Images showing the field  
162 work in the Paracas National Reserve on the Peruvian coastline, February 2023. A) Sea  
163 lion carcasses on the beach; B) Dying sea lion with ataxia; C) Dead sea lion with avian  
164 flu symptoms (whitish secretions); D) Sea lion necropsy showing a congestive brain; E)  
165 Sea lion trapping and eating an infected Guanay cormorant on January 23th of 2023 in  
166 the Reserva Nacional Paracas; F) Field work sampling on a beach with a large number  
167 of bathers in the surroundings of infected carcasses (the red arrow indicates SERNANP  
168 personal with health protection equipment conducting field survey). Photo credits: A, B  
169 and D, Daniel Ampuero; C and F, Giancarlo Inga; E, Sandra Lizarme.

Figure 1.1

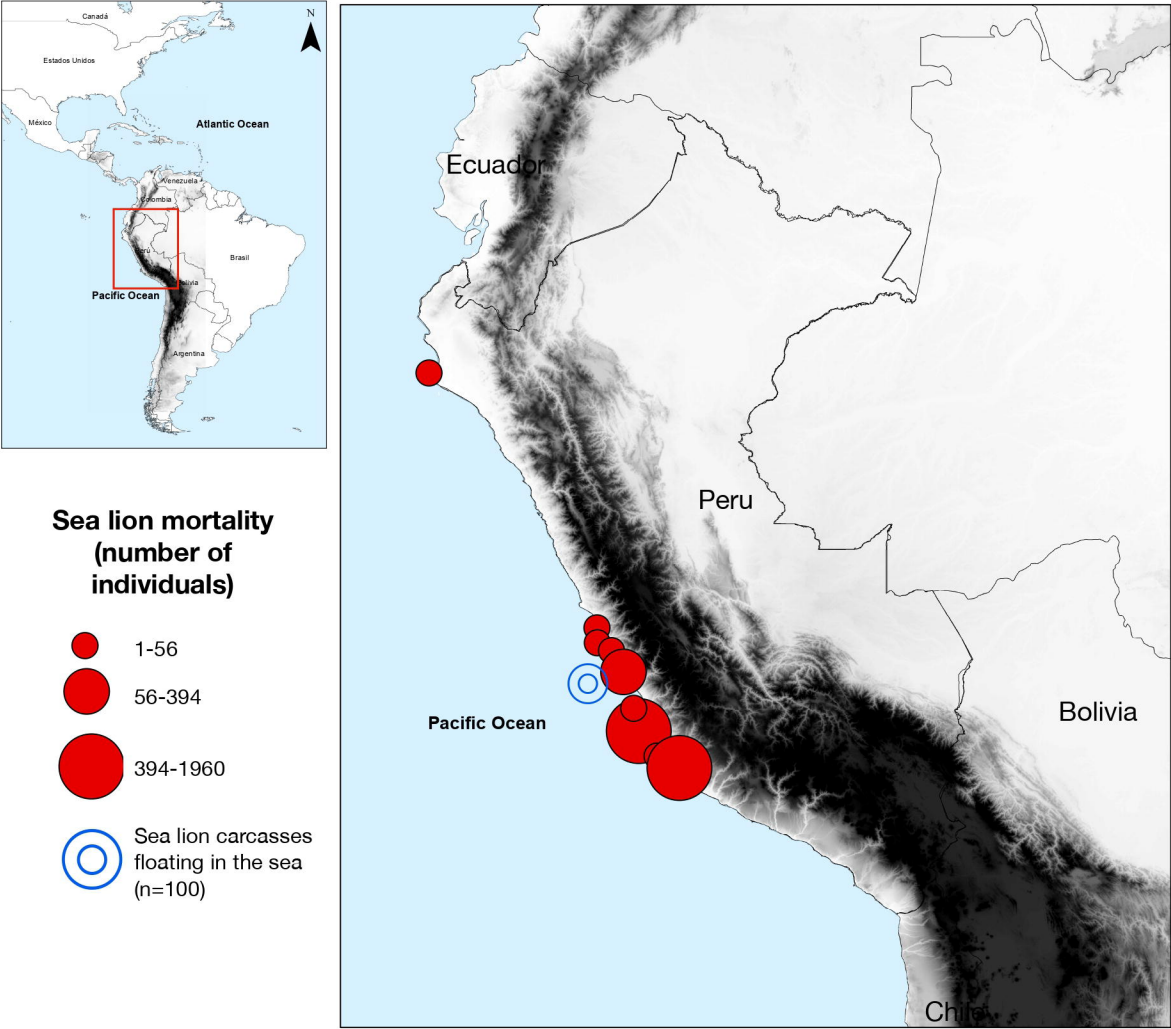

Figure 1.2

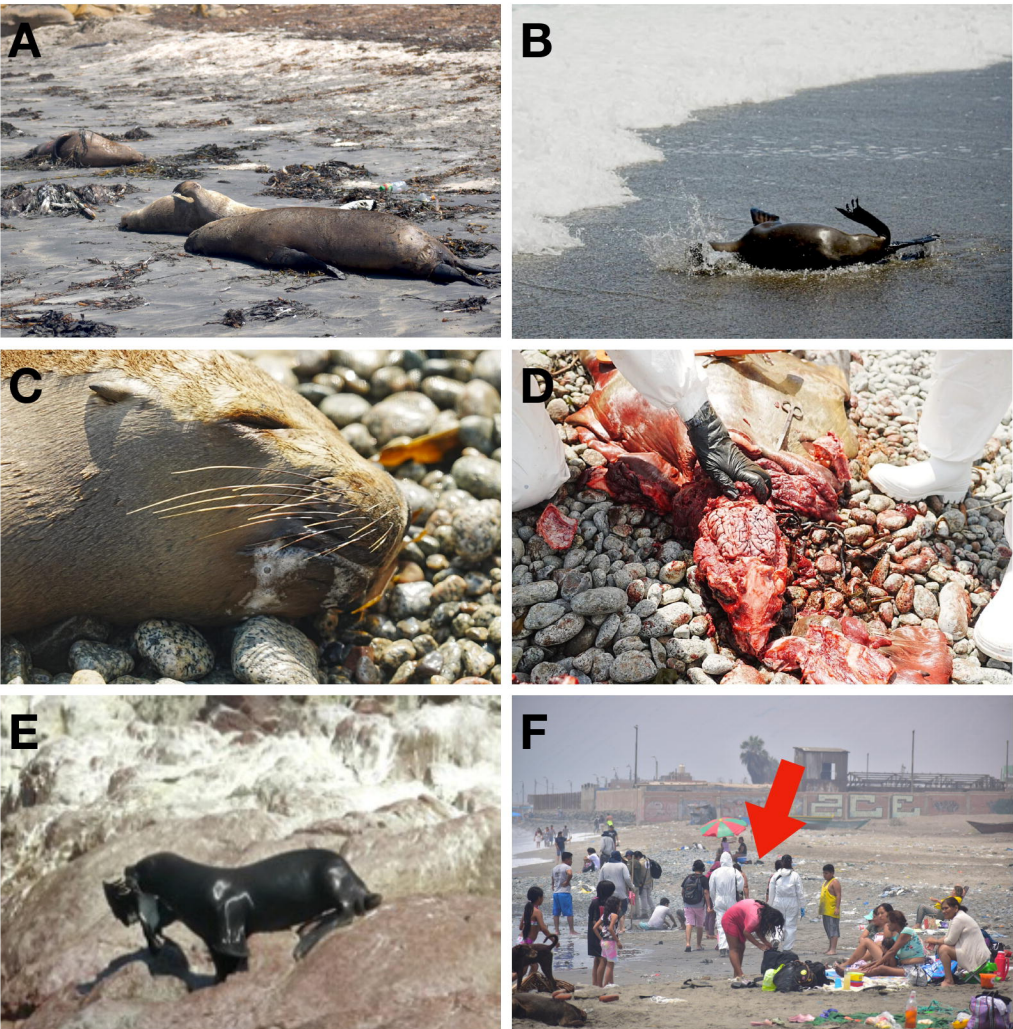

Source: https://www.biorxiv.org/content/10.1101/2023.02.08.527769.full.pdf
